# Supplementary material for: Ataxin1L Is a Regulator of HSC Function Highlighting the Utility of Cross-Tissue Comparisons for Gene Discovery
Source: PLoS Genet. 2013 Mar 28;9(3):e1003359. doi: 10.1371/journal.pgen.1003359 (PMC3610904; doi:10.1371/journal.pgen.1003359)
Supplement: Table S2 — A compendium of genes shown to affect HSC function was analyzed for neurological phenotype. Genes with a reported HSC phenotype were also likely to have a neurological phenotype (Z = 4.06; p = 5.72×10−5). (XLSX) [file pgen.1003359.s002.xlsx]

## Sheet: Supp Table 2
GENE	Transplanation assays performed	Severe in vivo defect	moderate in vivo defect	mild in vivo defect	Defect but only after second or third TP	Apparently normal	Increased engraftment	Change in phenotypic HSC number	Have Neuro phenotype
Akt1	YES					YES		-	TRUE
Akt2	YES					YES		NC	TRUE
Als2								+	TRUE
Arhgap1	YES	YES						+	TRUE
Atg7	YES	YES						-	TRUE
Atm	YES	YES						+	TRUE
Bmi1	YES	YES						-	TRUE
Camk4	YES	YES						-	TRUE
Cbl	YES						YES	+	TRUE
Cbx2	YES					YES			FALSE
Cdc42	YES	YES						+	TRUE
Cdkn1a (p21)	YES				YES				TRUE
Cdkn1b (p27)	YES						YES	+	TRUE
Cdkn1c p57(kip2)	YES		YES					-	TRUE
Cdkn2d (p19Arf)	YES					YES		NC	TRUE
Cebpa	YES						YES	+	TRUE
Cited2	YES	YES						NC	TRUE
Crebbp	YES		YES					-	TRUE
Csf3r	ND								FALSE
Ctnnb1	YES		YES					NC	TRUE
Cxcl12	YES		YES					-	TRUE
Cxcr4	YES						YES	NC	TRUE
Dnmt1	YES	YES							TRUE
Dnmt3a	YES						YES	+	TRUE
Egr1	YES				YES		YES	+	TRUE
Elf4	YES						YES	+	FALSE
Erg	YES	YES						-	TRUE
Fbxw7	YES		YES					-	TRUE
Fes	ND								TRUE
Flt3	ND								FALSE
Foxp3	YES		YES					-	TRUE
Gab2	YES		YES					NC	FALSE
Gabpa	YES		YES						TRUE
Gata2	YES					YES		-	TRUE
Gata3	YES					YES		NC	TRUE
Gfi1	YES	YES						+	TRUE
Gfi1b	YES						YES	+	FALSE
Ghrhr	YES					YES			TRUE
Gja1	YES			YES					TRUE
Gjb1 (Cx32)	ND							+	TRUE
Gli1	YES						YES	+	TRUE
Hmgb3	YES					YES		NC	FALSE
Hoxa10	YES					YES			TRUE
Hoxa9	YES		YES					NC	FALSE
Hoxb4	YES			YES				NC	FALSE
Id1	YES							+	TRUE
Igfbp2	YES					YES		-	FALSE
Igsf5	ND							NC	FALSE
Il2	YES		YES					+	TRUE
Inpp5d (SHIP)	YES	YES						+	TRUE
Irf2	YES	YES						-	FALSE
Itch	YES						YES	+	TRUE
Itga4	YES			YES					FALSE
Jam2 (Jam-B)	ND							NC	FALSE
Kit	ND								TRUE
Kitl									TRUE
Lyl1	YES		YES					NC	FALSE
Matk	ND							+	FALSE
Mcl1	YES		YES					-	FALSE
Mef2c	YES		YES					NC	TRUE
Msi2	YES		YES						FALSE
Myb	YES						YES	+	FALSE
Myst3	YES	YES						-	TRUE
Pbx1	YES	YES						-	TRUE
Pcgf2 (mel18)	YES		YES					-	TRUE
Prdm16	YES	YES						-	TRUE
Prnp	YES	YES						-	TRUE
Pten	YES				YES				TRUE
Rac1							YES	+	TRUE
Runx1	YES						YES	+	TRUE
Rxra	YES						YES		TRUE
Sfrp1	YES		YES					-	TRUE
Sipa1 (Spa-1)	YES	YES						-	FALSE
Sirt1	ND							+	TRUE
Skp2	ND							NC	FALSE
Smad4	YES						YES	NC	TRUE
Smad5	YES			YES				-	TRUE
Smo	YES					YES		NC	TRUE
Sox17	YES					YES		NC	FALSE
Tcea1	YES	YES						NC	FALSE
Tet2	YES		YES					NC	FALSE
Tgfb2	YES						YES	+	TRUE
Tgfbr1	YES				YES			-	TRUE
Tnfrsf1a (p55)	YES					YES			TRUE
Trp53	YES			YES				-	TRUE
Tsta3 (FX)	YES						YES	-	TRUE
Txnip	YES		YES					-	FALSE
Ugt8a	YES			YES				-	TRUE
Vhl	ND								FALSE
Wnt3a	YES	YES						+	TRUE
Zfp36	YES				YES			-	TRUE
Zfp36l2	YES					YES		NC	FALSE
Zfx	YES	YES						-	TRUE
Kahle, Souroullas et al., PLoS Genetics 2013
See Rossi et al., Cell Stem Cell 2012 for more details
